# Supplementary material
Source: PubMed Central journal article supplement (PMC5588898)

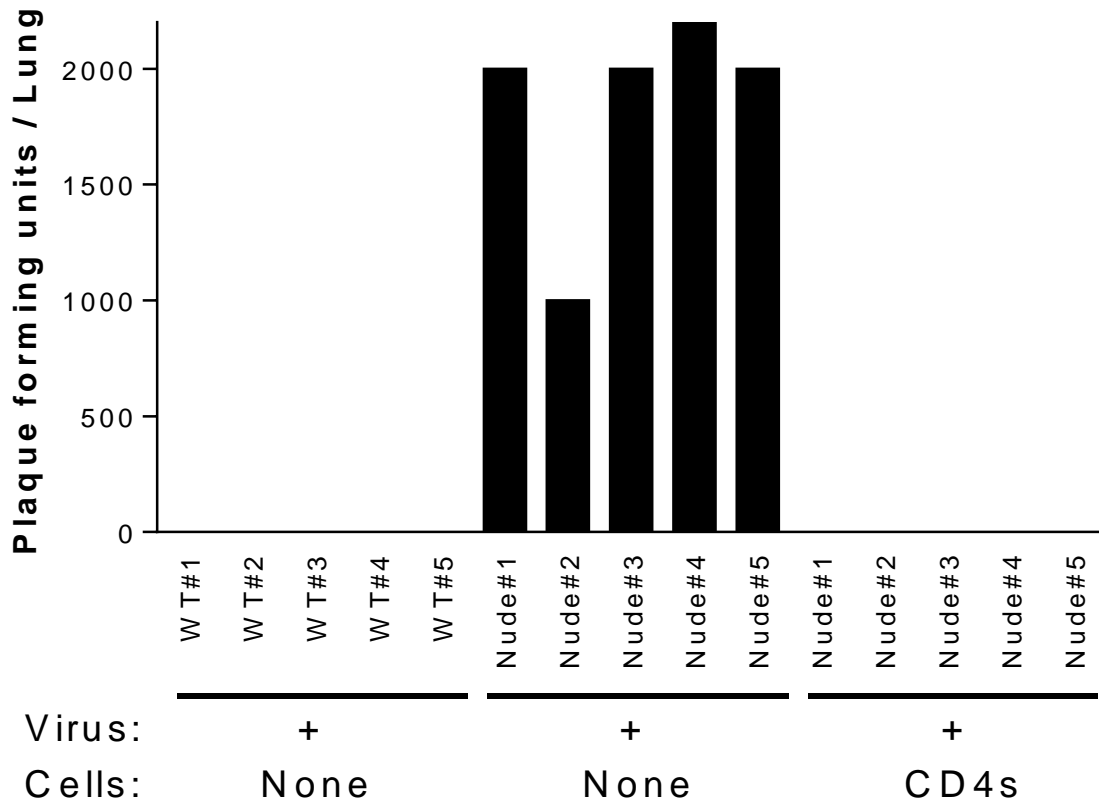

Supplement: NIHMS901494-supplement.pdf [file NIHMS901494-supplement.pdf]
